# Supplementary material for: Fecal Microbiota Analysis Exploring Taxonomic Diversity of Hindgut Microbial Communities in Kasaragod Dwarf and Holstein Friesian Cattle
Source: Research Square preprint supplement (doi:10.21203/rs.3.rs-732782/v1), 2021-08-13
Supplement: Supplementary file 1 [file 1b15ac943d898af8aafc6522.docx]

**Title:** Fecal Microbiota Analysis Exploring Taxonomic Diversity of Hindgut Microbial

Communities in Kasaragod Dwarf and Holstein Friesian Cattle

**Journal:** Journal of Applied Genetics

**Authors:** Deepthi M1, Kumar Arvind1, Rituja Saxena2, Joby Pulikkan1, Shamjana U1,Vineet K

Sharma2, Tony Grace1*

**Affiliation:**

1. Department of Genomic Science, School of Biological Sciences, Central University of Kerala, Kasaragod, Kerala, India
2. Metagenomics and Systems Biology Group, Department of Biological Sciences, Indian Institute of Science Education and Research Bhopal, Bhopal, India

**Corresponding author:**  Dr. Tony Grace, Assistant Professor, Department of Genomic Science, School of Biological Sciences, Central University of Kerala, Tejaswini Hills, Periye, Kasaragod, Kerala, India- 671316; +917907261532;

**Emial ID:** [tonygrace@cukerala.ac.in](mailto:tonygrace@cukerala.ac.in)

| **Phylum** | **Pvalues** | **FDR** |
| --- | --- | --- |
| Bacteroidetes | 3.93E-12 | 4.71E-11 |
| Proteobacteria | 8.57E-09 | 5.14E-08 |
| TM7 | 3.78E-07 | 1.51E-06 |
| Actinobacteria | 0.000195 | 0.000586 |
| Cyanobacteria | 0.001533 | 0.00368 |
| Tenericutes | 0.003187 | 0.006067 |
| Elusimicrobia | 0.003539 | 0.006067 |
| Firmicutes | 0.034657 | 0.049324 |
| Spirochaetes | 0.036993 | 0.049324 |

**Supplementary Table 3:** Comparison of microbial communities at the phylum level based on MetagenomeSeq analysis. FDR adjusted p-value < 0.001
